# Supplementary material
Source: PubMed Central journal article supplement (PMC4533861)
Supplement: NIHMS704736-supplement-Supplemental_Data.pdf [file NIHMS704736-supplement-Supplemental_Data.pdf]

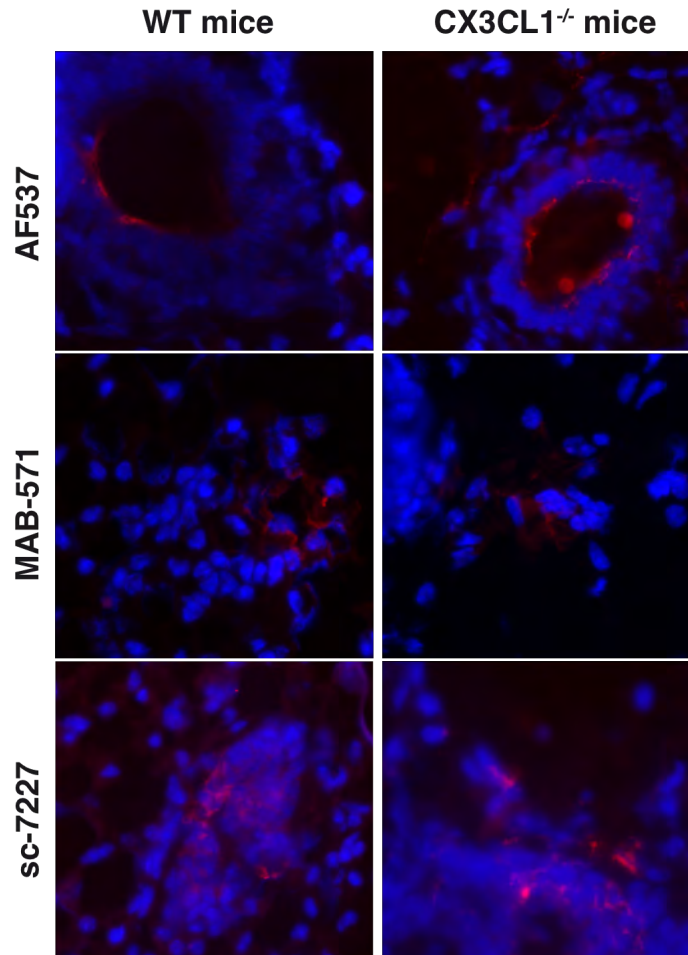

*Supplementary Fig. S1. CX3CL1 staining in mammary glands of WT and CX3CL1<sup>-/-</sup> mice.*

Sections of mammary glands of 12-week-old nulliparous WT and CX3CL1<sup>-/-</sup> mice were stained with the anti-CX3CL1 antibodies (red); nuclei were counterstained with DAPI. Images are representative of three independent experiments.

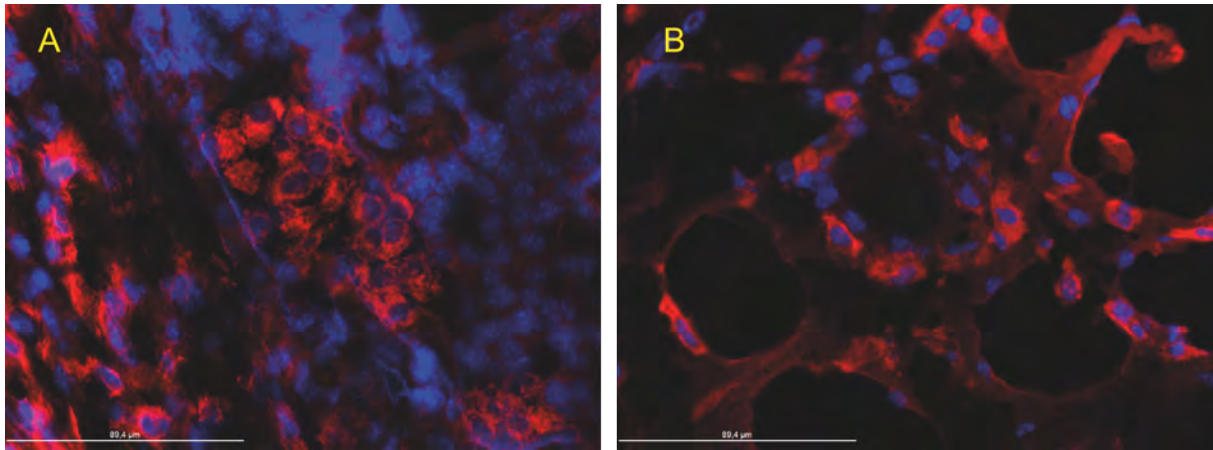

*Supplementary Fig. S2. Staining of CX3CR1 in tumors and mammary glands of Tg-neu mice.* Sections of breast tumors (A) and tumor-free mammary glands (C) of Tg-neu mice were stained with an in-house developed murine CX3CL1 fused to human Ig-Fc (red). Nuclei were counterstained with DAPI. Images are representative of two independent experiments.

Bar = 90 µm

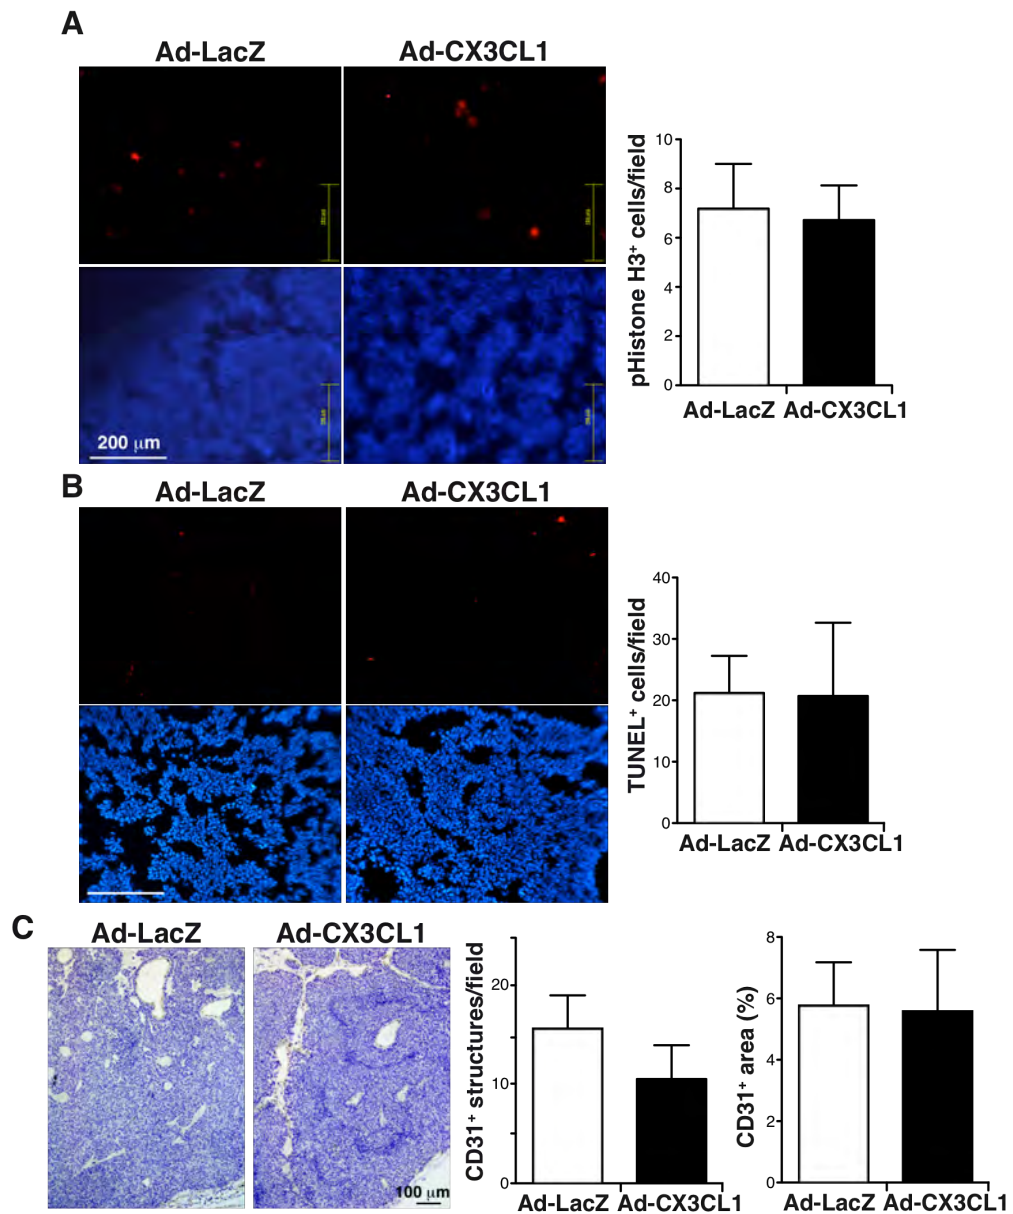

*Supplementary Fig. S3. Effects of Ad-CX3CL1 or Ad-LacZ injection in tumor proliferation, apoptosis and angiogenesis.* Representative images of sections from Ad-CX3CL1- and Ad-LacZ-injected tumors stained (red) for phospho Histone-H3 (A) and TUNEL (B) to determine the fraction of proliferating and apoptotic cells, respectively. Quantification of images is shown at the right ( $n = 4$  mice/group, 8 fields per mouse). Bar, 200  $\mu\text{m}$ . C, Ad-CX3CL1- and Ad-LacZ-injected tumors were stained for CD31 to visualize blood vessels (hematoxylin counterstaining). Quantification of the number of CD31<sup>+</sup> structures and the CD31<sup>+</sup>-stained area is shown at the right ( $n = 4$  mice/group,  $\geq 10$  fields per mouse)

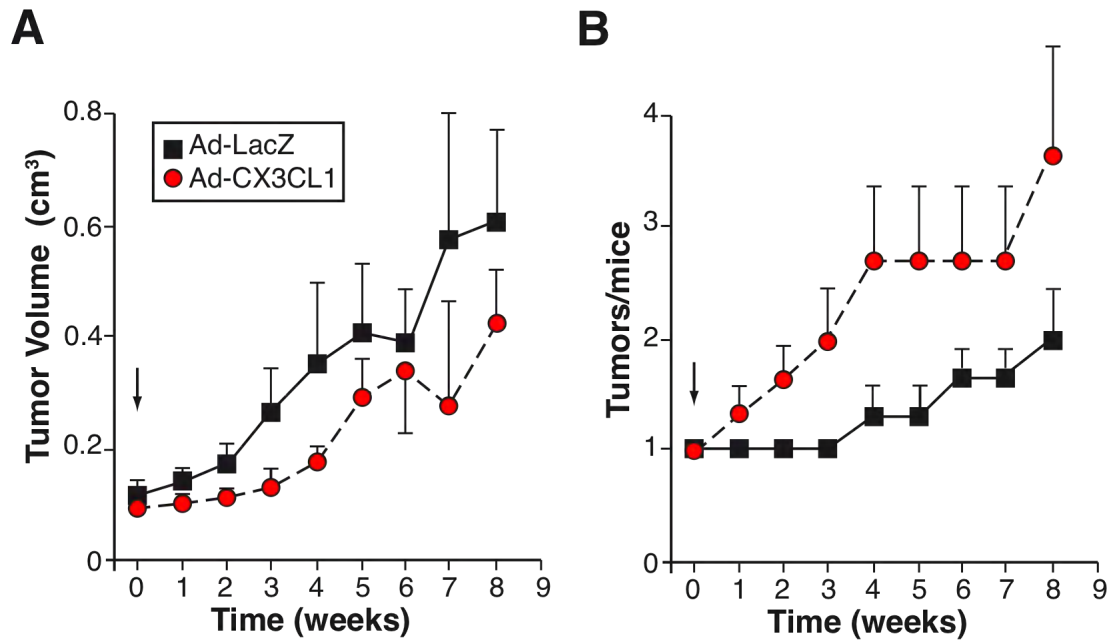

Supplementary Fig. S4. *CX3CL1* overexpression increases breast carcinogenesis in *Tg-neu* mice. Tumor growth kinetics (A) and mean tumor number (B) in *Tg-neu* mice after a single intratumor injection (arrow) of Ad-CX3CL1 or Ad-LacZ virus. Data are mean  $\pm$  SEM ( $n = 4$  mice/group; two-way ANOVA with Bonferroni post-test).

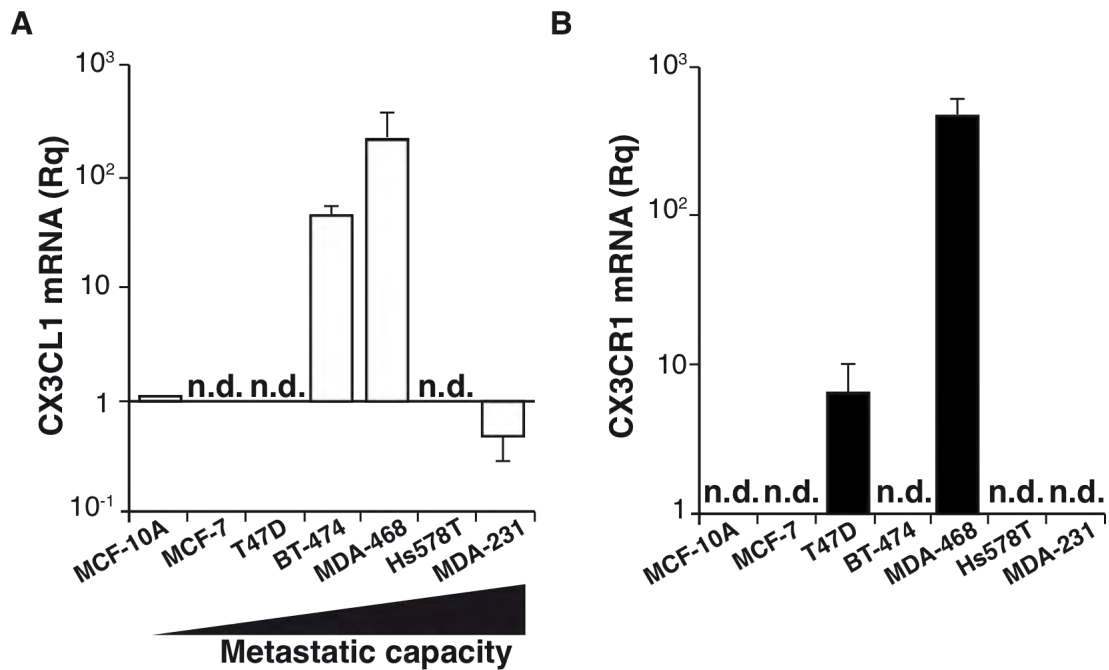

*Supplementary Fig. S5. CX3CL1 or CX3CR1 mRNA expression in breast cancer cell lines with distinct metastatic potential.* CX3CL1 (A) and CX3CR1 (B) mRNA levels in a panel of human breast cancer cell lines classified by their metastatic potential. The untransformed MCF-10A epithelial breast cell line was included as a control, and considered the reference value for calculation of relative quantity of CX3CL1 and CX3CR1 mRNA. Data are mean  $\pm$  SEM of triplicates in one representative experiment of two; n.d., not detected.

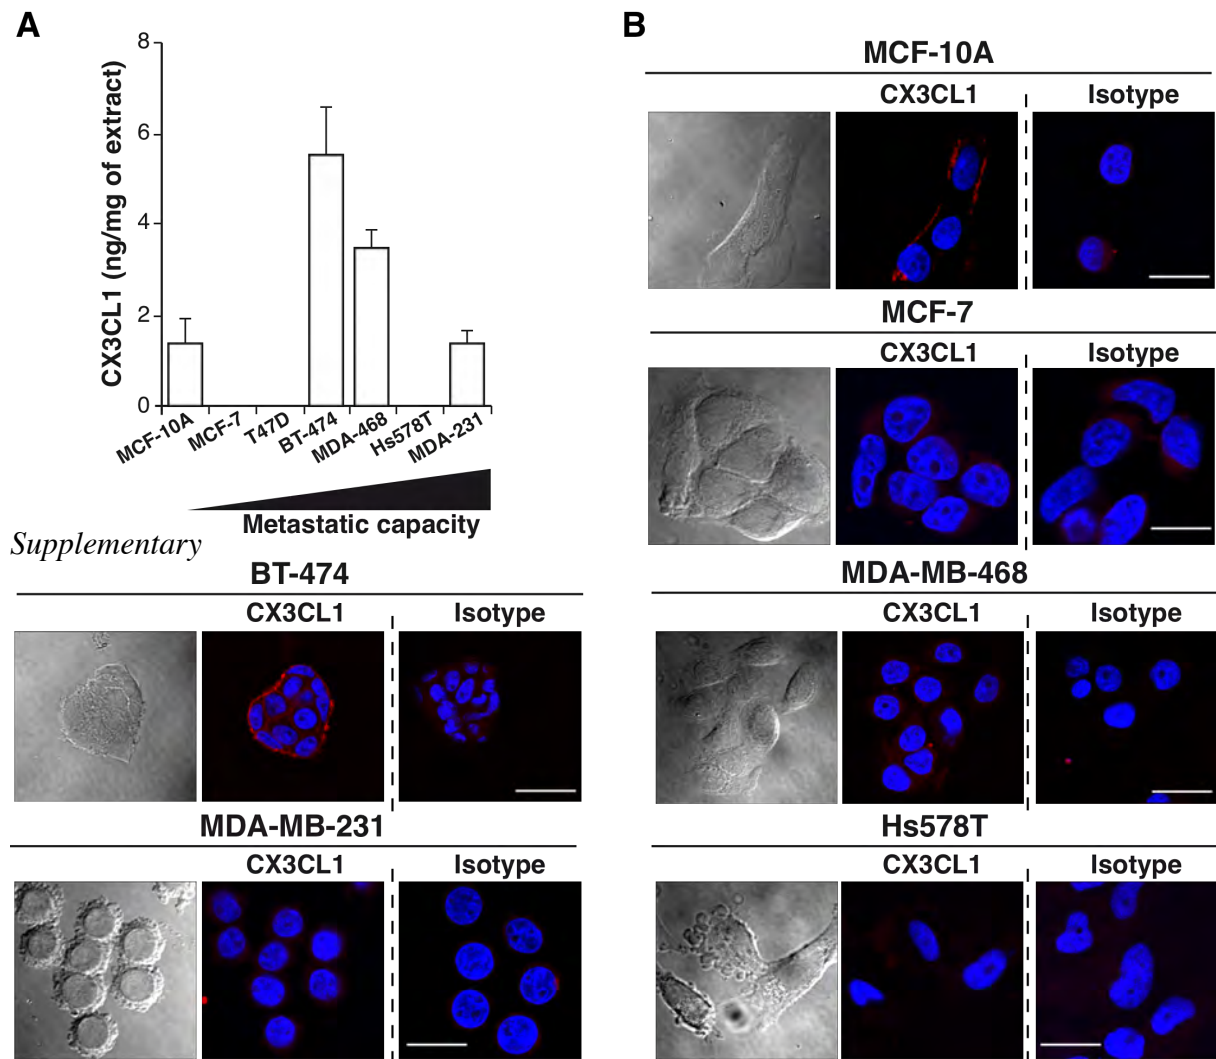

*Fig. S6. CX3CL1 expression in a panel of breast cancer cell lines.* A, CX3CL1 levels quantified by ELISA in a panel of human breast cancer cell lines. Data are mean  $\pm$  SEM of triplicates in one representative experiment of three. B, Cells cultured on slides were stained with anti-human CX3CL1 antibody (AF 536, R&D systems); nuclei were DAPI-counterstained. All experiments were performed in parallel with an isotype-matched control antibody. Images are representative of at least 20 cells in each of three independent experiments. Bar = 15  $\mu$ m, except for MCF-10A (bar = 25  $\mu$ m) and BT-474 (bar = 30  $\mu$ m).

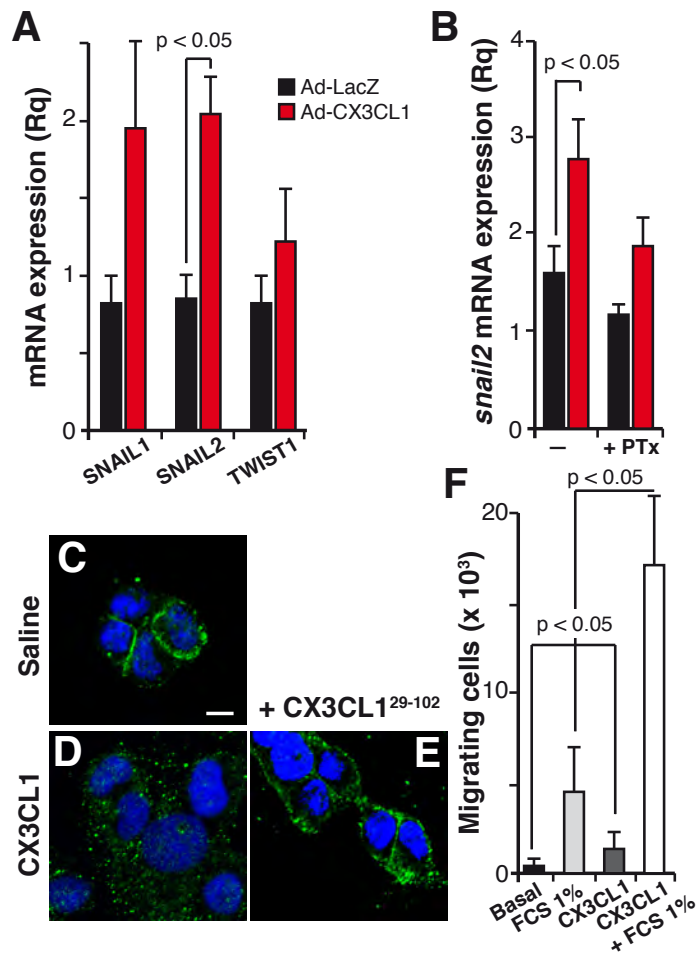

*Supplementary Fig. S7. CX3CL1 induces EMT in breast cancer cells.* A, Relative mRNA levels for the indicated genes in Ad-CX3CL1- and Ad-LacZ-infected T47D cells. B, Snail2 mRNA expression in Ad-CX3CL1 and Ad-LacZ-infected T47D cells treated with vehicle (-) or pertussis toxin (+PTx). For A and B, data are expressed as a relative quantity using Ad-LacZ-infected cells as a reference ( $n = 3$ ; one-tailed Student's t-test). C-E, Localization of E-cadherin (green) in T47D cells stimulated with saline (C), CX3CL1 (D) or CX3CL1 plus the antagonist CX3CL1<sup>29-102</sup> (E); nuclei were counterstained with DAPI. Cells are representative of 50 analyzed for each condition in two independent experiments; bar = 20  $\mu$ m. F, T47D cell chemotaxis was assayed in transwell devices using the indicated doses of CX3CL1 in the absence (basal) or presence of 1% FCS. Data are mean  $\pm$  SEM of triplicates ( $n = 2$ ).

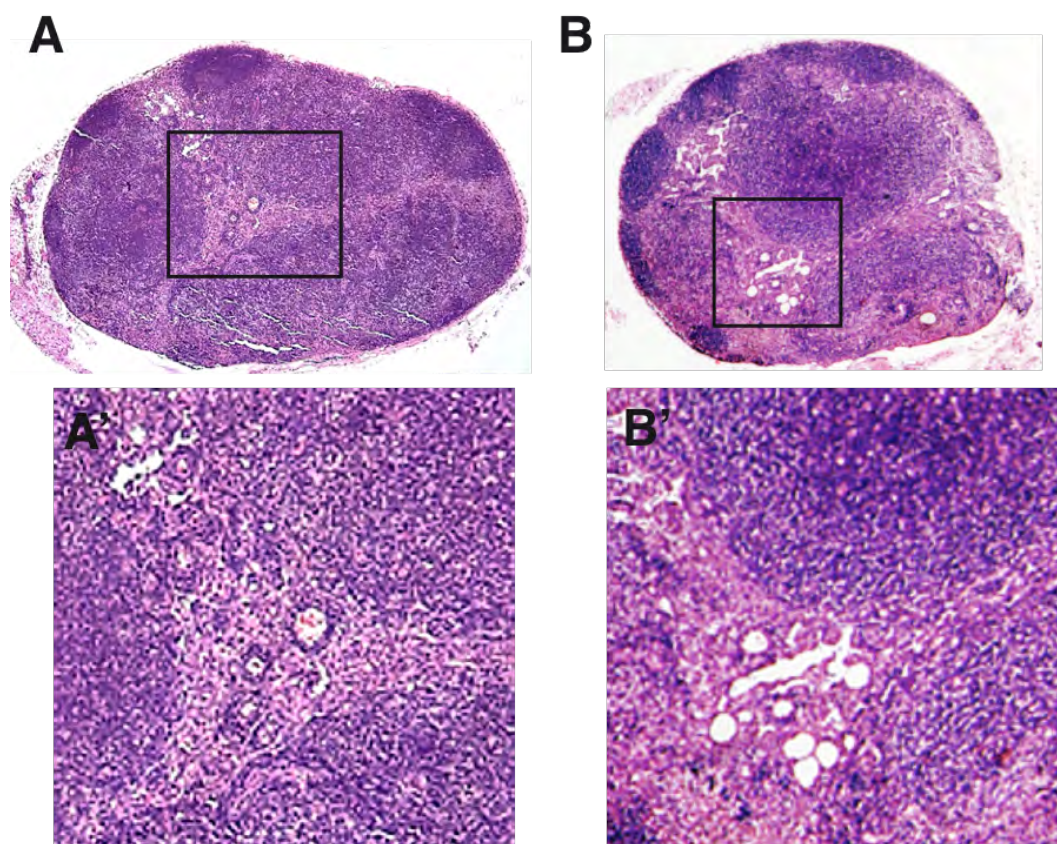

*Supplementary Fig. S8. Lack of lymphoid metastases in Ad-CX3CL1-injected Tg-neu mice.*

A-B, Hematoxylin-eosin staining of LN adjacent to tumors from Ad-CX3CL1- (A) and Ad-LacZ-injected mice (B). Bottom panels (A', B') show digitally zoomed boxed areas.



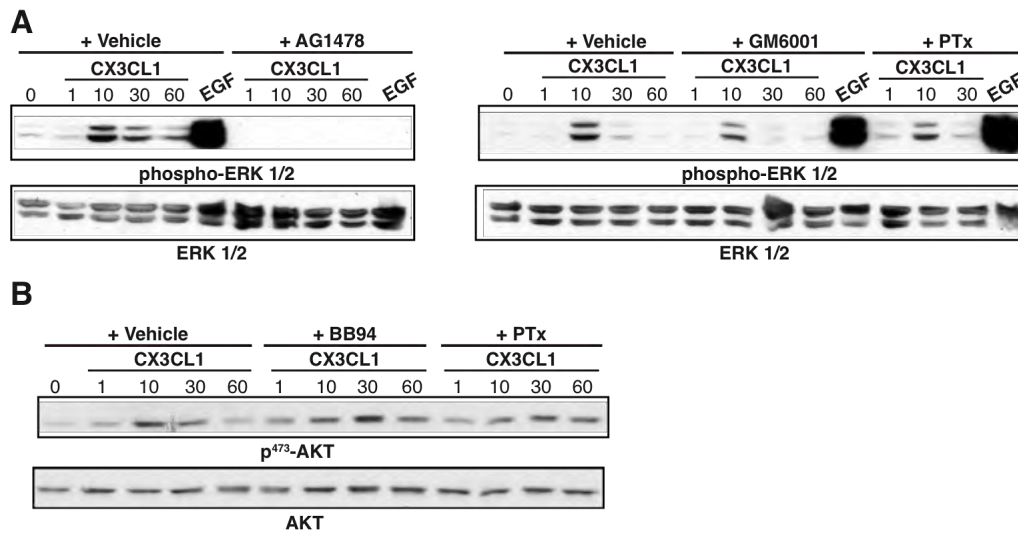

*Supplementary Fig. S9. CX3CL1 induces transactivation of the EGF pathway.* Analysis of CX3CL1-induced ERK (A) and AKT (B) activation in T47D cells. T47D cells were pretreated with inhibitors and stimulated with CX3CL1 for indicated times, or with EGF (10 min). Phosphorylated ERK 1/2 and AKT, and total ERK and AKT were determined in cell extracts. Representative blots from 4 independent experiments.

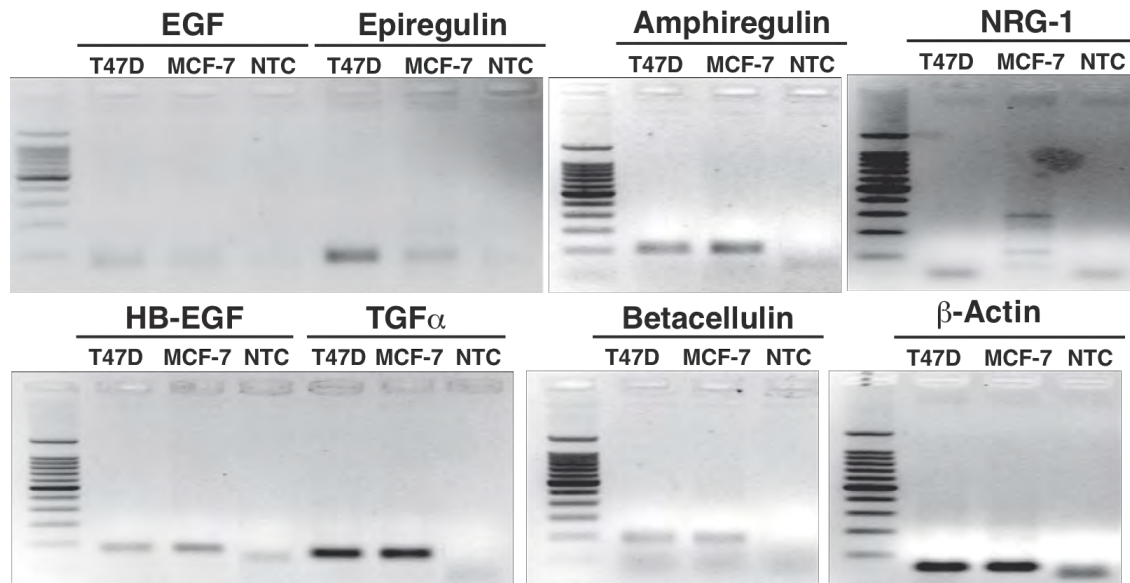

*Supplementary Fig. S10. ErbB ligand expression in T47D cells.* Total RNA of T47D cells or MCF-7 cells was retrotranscribed and assayed for PCR using the oligonucleotides and annealing temperatures indicated in Suppl. Table S2. Gels representative of two independent experiments. NTC; Non Template Control.

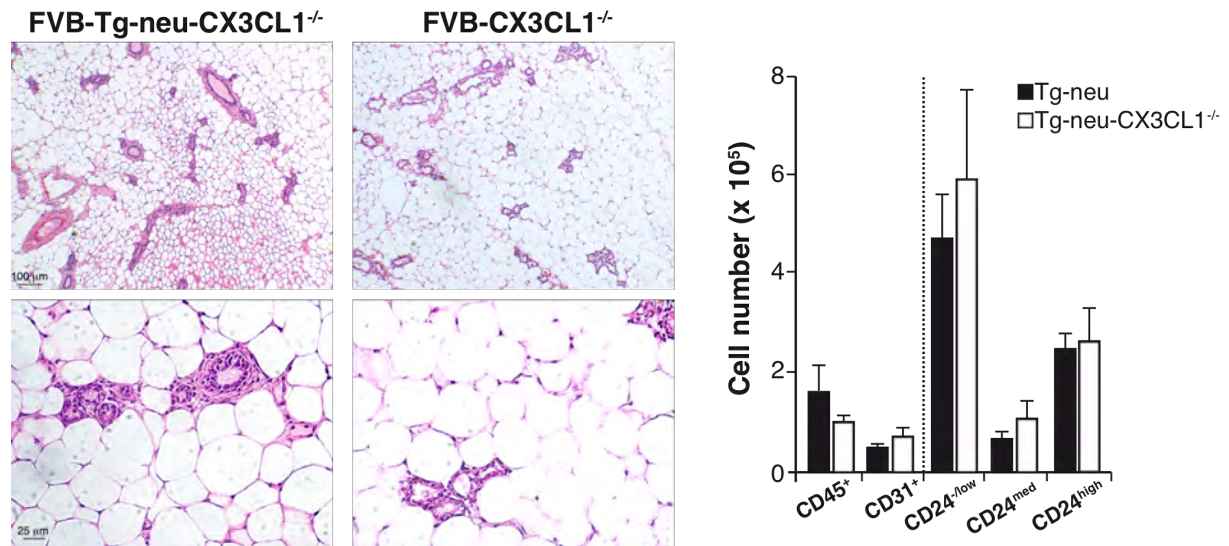

*Supplementary Fig. S11. CX3CL1 deficiency does not affect the structure and composition of the mammary gland in Tg-neu mice.* A, Representative hematoxylin/eosine stained sections of mammary glands from 8 to 12-weeks old nulliparous Tg-neu-CX3CL1<sup>-/-</sup> mice. B, Glands of Tg-neu and Tg-neu-CX3CL1<sup>-/-</sup> mice were digested, stained with antibodies against surface markers and analyzed by flow cytometry. Data are mean ± SEM of the total numbers for each cell subpopulation ( $n = 5$ , WT mice;  $n = 4$  Tg-neu-CX3CL1<sup>-/-</sup> mice).

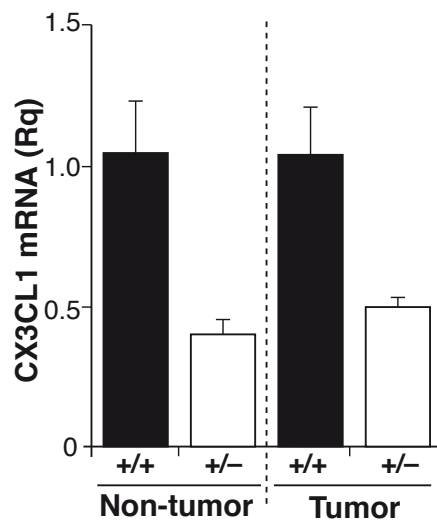

*Supplementary Fig. S12. Hemizygous CX3CL1 mRNA expression in Tg-neu-CX3CL1<sup>+/-</sup> mice.* CX3CL1 mRNA expression in healthy breast tissue (left) and breast carcinomas (right) derived from Tg-neu-CX3CL1<sup>+/-</sup> mice. Values were normalized to CX3CL1 mRNA levels expressed in Tg-neu mice for each condition ( $n = 4$  mice/group).

*Supplementary Table S1. Media used to culture the cancer cell lines*

| <b>Cell Line</b> | <b>Culture medium</b>                                                                              |
|------------------|----------------------------------------------------------------------------------------------------|
| N202.1A          | DMEM plus 10% FCS, 1 mM sodium pyruvate, 1% non-essential amino acids                              |
| 1G11             | DMEM plus 20% FCS, 1 mM sodium pyruvate, 1% non-essential amino acids                              |
| MCF-10A          | DMEM:F12 (1:1) plus 5% horse serum, hydrocortisone (0.5 µg/ml), EGF (20 ng/ml), insulin (10 µg/ml) |
| MCF-7            | MEM plus 10% FCS, 1 mM sodium pyruvate, 1% non-essential amino acids                               |
| BT-474           | RPMI 1640 plus 10% FCS, sodium bicarbonate (1.5 g/l), 1.2 mM oxalacetic acid, insulin (20 µg/ml)   |
| T47D             | RPMI 1640 plus 10% FCS, sodium bicarbonate (1.5 g/l)                                               |
| MDA-MB-468       | Leibovitz's L-15 plus 10% FCS                                                                      |
| MDA-MB-231       | DMEM plus 10% FCS                                                                                  |
| Hs578T           | DMEM plus 10% FCS                                                                                  |

Supplementary Table S2. Primers and annealing conditions used for PCR

| Gene <sup>1</sup>  | Primers (Forward/Reverse)                                           | Annealing (°C, min) |
|--------------------|---------------------------------------------------------------------|---------------------|
| (m) <i>b-actin</i> | 5'- GGCACCACACCTTCTACAATG -3'<br>5'- TGGATGGCTACGTACATGGCTG -3'     | 67°C, 1.5           |
| (h) <i>b-actin</i> | 5'- CCCAGCACAATGAAGATCAA<br>5'- CGATCCACACGGAGTACTTG                | 60°C, 1.0           |
| (m) <i>cx3cl1</i>  | 5'- CCGCGTTCTTCCATTTGTGT -3'<br>5'- AAGCCACTGGGATTCGTGAG -3'        | 67°C, 1.5           |
| (m) <i>cx3cr1</i>  | 5'- TGGCACTTCTGCAGAAGTTC -3'<br>5'- GGCCTCAGCAGAATCGTCATA -3'       | 67°C, 1.5           |
| (h) <i>cx3cl1</i>  | 5'- CGGCAAACGCGCAATCATC -3'<br>5'- TTCTCGAAGGTGCCGCCATTT -3'        | 60°C, 1.0           |
| (h) <i>cx3cr1</i>  | 5'- TGA CTGGCAGATCCAGAGGTT -3'<br>5'- GTTTTCTGTC ACTGATTCAGGGAA -3' | 60°C, 1.0           |
| (h) <i>snai1</i>   | 5'- CACTATGCCGCGCTCTTTC -3'<br>5'- GGTCGTAGGGCTGCTGGAA -3'          | 68°C, 0.83          |
| (h) <i>snai2</i>   | 5'- GGCAAGGCGTTTTCCAGAC -3'<br>5'- GCTCTGTTGCAGTGAGGGC -3'          | 59°C, 0.83          |
| (h) <i>twist1</i>  | 5'- CATGTCCGCGTCCCACTAG -3'<br>5'- TGTCCATTTTCTCCTTCTCTGG -3'       | 59°C, 0.83          |
| (h) <i>cdh1</i>    | 5'- AGAACGCATTGCCACATACACTC -3'<br>5'- CATTCTGATCGGTTACCGTGATC -3'  | 60°C, 0.83          |
| (h) <i>egf</i>     | 5'- AAGAATGGGGGTCAACCAGT -3'<br>5'- TGAAGTTGGTTGCATTGACC -3'        | 66°C, 1.0           |
| (h) <i>areg</i>    | 5'- TTTCAA AATTTCTGCATTACAG -3'<br>5'- ACTTTTCCCCACACCGTTC -3'      | 60°C, 1.0           |
| (h) <i>ereg</i>    | 5'- AGGATGGAGATGCTCTGTGC -3'<br>5'- TGAGGACTGCCTGTAGAAGATG -3'      | 66°C, 1.0           |
| (h) <i>hbegf</i>   | 5'- TGGGGCTTCTCATGTTTAGG -3'<br>5'- CATGCCCAACTTCACTTTCTC -3'       | 60°C, 1.0           |
| (h) <i>tgfa</i>    | 5'- GCTGCCACTCAGAAACAGTG -3'<br>5'- ATCTGCCACAGTCCACCTG -3'         | 60°C, 1.0           |
| (h) <i>btc</i>     | 5'- ACTGCATCAAAGGGAGATGC -3'<br>5'- TCTCACACCTTGCTCCAATG -3'        | 60°C, 1.0           |
| (h) <i>nrg-1</i>   | 5'- TGGTTCAAGAATGGGAATGA -3'<br>5'- CATCACTGGCTGATTCTGGA -3'        | 60°C, 1.0           |

<sup>1</sup>(h), human; (m), mouse; *cdh1*, e-cadherin; *areg*, amphiregulin; *ereg*, epiregulin; *btc*, betacellulin; *nrg*, neuregulin
